# Supplementary material
Source: publisher figshare collection journal article supplement (https://sage.figshare.com/ndownloader/files/16347458)

**Figure S3.** Heat stabilization treatment with the Denator Stabilizer T1 instrument is compatible with PFGE as no difference is seen between untreated and treated bacterial suspensions. Gel was loaded with H9812#4 standard (lanes 1, 8, and 15), *S. flexneri* 71-2783 untreated (2) and treated (3), *S. dysenteriae* untreated (4) and treated (5), *S. flexneri* 94-3007 untreated (6) and treated (7), *E. coli* 2011C-4315 untreated (9) and treated (10), *E. albertii* 2014C-4356 untreated (11) and treated (12), and *E. coli* 2012-4431 untreated (13) and treated (14).


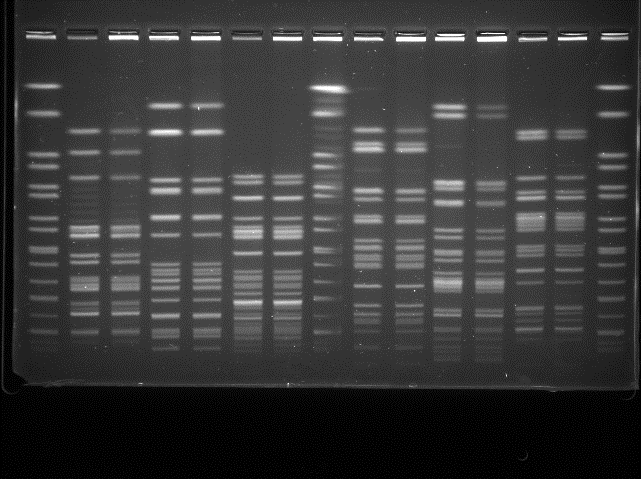

Supplement: Supplementary file 1 [file 16347458]
